# Supplementary material
Source: publisher figshare collection journal article supplement (https://acs.figshare.com/ndownloader/files/9167623)
Supplement: Supplementary file 1 [file 9167623]

# Supporting Information

## Highly-Efficient Guiding of Motile Microtubules on Non-Topographical Motor Patterns

Cordula Reuther <sup>1,2,+</sup>, Matthäus Mittasch <sup>1,2,+</sup>, Sundar R. Naganathan <sup>2,♦</sup>,  
Stephan W. Grill <sup>3,2</sup>, Stefan Diez <sup>1,2,\*</sup>

<sup>1</sup> B CUBE - Center for Molecular Bioengineering, Technische Universität Dresden, Germany

<sup>2</sup> Max Planck Institute of Molecular Cell Biology and Genetics, 01307 Dresden, Germany

<sup>3</sup> BIOTEC, Technische Universität Dresden, Germany

♦ current address: The Francis Crick Institute, 1 Midland Road, London NW1 1AT, UK.

+ equal contribution,

\*correspondence to: *e-mail* stefan.diez@tu-dresden.de; *phone* +49 351 46343010

### Movie\_S1

Guided motility of microtubules along non-topographical kinesin-1 tracks with different curvatures. The tracks were generated on a PLL-PEG coated surface using a UV-laser-based patterning technique. The location of the tracks was inferred from a fluorescent micrograph of fluorescein-labeled casein molecules (shown in green). Real-time images of microtubules (labeled with rhodamine, shown in red) are superimposed.

### Movie\_S2

Microtubule motility on a periodic pattern of arc segments of kinesin-1 molecules. The pattern layout was adapted from the simulation results of Rupp and Nedelec (*Lab Chip* **2012**, 12, 4903-4910) for directed transport. The arc-pattern was generated on a PLL-PEG coated surface using a UV-laser-based patterning technique. The location of the tracks was inferred from a fluorescent micrograph of fluorescein-labeled casein molecules (shown in green). Real-time images of microtubules (labeled with rhodamine, shown in red) are superimposed.
